# Supplementary material for: Prospective associations between breast feeding, metabolic health, inflammation and bone density in women with prior gestational diabetes mellitus
Source: PubMed Central journal article supplement (PMC11110608; doi:10.1136/bmjdrc-2024-004117), 2024-05-21
Supplement: bmjdrc-2024-004117supp001.pdf [file bmjdrc-2024-004117supp001.pdf]

**Supplementary Table 1** Adverse pregnancy outcomes according to breastfeeding category in women with prior GDM

|                                         | <b>All<br/>(n=171)<br/>n (%)</b> | <b>BF<sup>&lt;6</sup><br/>(n=69)<br/>n (%)</b> | <b>BF<sup>≥6</sup><br/>(n=102)<br/>n (%)</b> | <b>p-value</b> |
|-----------------------------------------|----------------------------------|------------------------------------------------|----------------------------------------------|----------------|
| Pregnancy-induced hypertension (n=124)  |                                  |                                                |                                              | 0.23           |
| Yes                                     | 2 (1.6)                          | 0 (0.0)                                        | 2 (2.7)                                      |                |
| Preeclampsia during pregnancy (n=98)    |                                  |                                                |                                              | 0.76           |
| Yes                                     | 3 (3.1)                          | 1 (2.4)                                        | 2 (3.5)                                      |                |
| Placenta previa during pregnancy (n=92) |                                  |                                                |                                              | 0.24           |
| Yes                                     | 1 (1.1)                          | 1 (2.6)                                        | 0 (0.0)                                      |                |
| Cesarean section (n=162)                |                                  |                                                |                                              | 0.17           |
| Yes                                     | 61 (37.7)                        | 29 (43.9)                                      | 32 (33.3)                                    |                |
| Prematurity (n=169)                     |                                  |                                                |                                              | 0.60           |
| Yes                                     | 15 (8.9)                         | 7 (10.3)                                       | 8 (7.9)                                      |                |
| Intrauterine growth restriction (n=170) |                                  |                                                |                                              | 0.90           |
| Yes                                     | 7 (4.1)                          | 3 (4.4)                                        | 4 (4.0)                                      |                |
| Small for gestational age (n=169)       |                                  |                                                |                                              | 0.10           |
| Yes                                     | 21 (12.4)                        | 12 (17.4)                                      | 9 (9.0)                                      |                |
| Large for gestational age (n=169)       |                                  |                                                |                                              | 0.38           |
| Yes                                     | 19 (11.2)                        | 6 (8.7)                                        | 13 (13.0)                                    |                |
| Hospitalization in neonatology (n=171)  |                                  |                                                |                                              | 0.87           |
| Yes                                     | 8 (4.7)                          | 3 (4.4)                                        | 5 (4.9)                                      |                |

Data are expressed as n (%). BF<sup><6</sup> denotes no or <6 months of breastfeeding, BF<sup>≥6</sup> denotes ≥6 months of breastfeeding.
