# Supplementary material for: Prospective associations between breast feeding, metabolic health, inflammation and bone density in women with prior gestational diabetes mellitus
Source: PubMed Central journal article supplement (PMC11110608; doi:10.1136/bmjdrc-2024-004117), 2024-05-21
Supplement: bmjdrc-2024-004117supp002.pdf [file bmjdrc-2024-004117supp002.pdf]

**Supplementary Table 2** Differences in lifestyle factors at 1-year postpartum according to breastfeeding category in women with prior GDM

| Lifestyle factors                                                       | BF <sup>&lt;6</sup> | BF <sup>≥6</sup>   | Model 1 <sup>a</sup>     |         | Model 2 <sup>b</sup>     |         |
|-------------------------------------------------------------------------|---------------------|--------------------|--------------------------|---------|--------------------------|---------|
|                                                                         | (n=69)<br>mean±SD   | (n=102)<br>mean±SD | β (95%CI)                | p-value | β (95%CI)                | p-value |
| Food intake (daily total calorie consumption, kcal/day) (n=160)         | 1575.3±1250.3       | 1518.7± 735.4      | -51.62 (-363.23, 260.00) | 0.74    | -49.62 (-380.38, 282.14) | 0.77    |
| Daily total physical activity (min/day) (n=119)                         | 309.8±79.0          | 322.2±96.6         | 14.61 (-18.72, 47.95)    | 0.39    | 14.57 (-20.60, 49.73)    | 0.41    |
| Time spent in moderate and vigorous physical activity (min/day) (n=119) | 144.3± 60.5         | 148.2± 66.2        | 4.90 (-18.95, 28.75)     | 0.69    | 3.12 (-21.77, 28.00)     | 0.80    |

Data are expressed as mean±standard deviation and beta (95% confidence interval). BF<sup><6</sup> denotes no or <6 months of breastfeeding; BF<sup>≥6</sup> denotes ≥6 months of breastfeeding.

<sup>a</sup> Adjusted for group allocation.

<sup>b</sup> Adjusted for group allocation, pre-pregnancy BMI, educational level and glucose-lowering treatment in pregnancy.
